# Supplementary material for: Impact of carbon nanotubes and graphene on immune cells
Source: PubMed Central journal article supplement (PMC4067374; doi:10.1186/1479-5876-12-138), 2014-05-21
Supplement: 1479-5876-12-138-S3.pdf [file 1479-5876-12-138-S3.pdf]

**Table 3. Functionalized carbon nanotubes and graphene on Macrophages**

| Material                                                                            | Funzionalizations                                 | Species                                                                             | Model                        | Other cell types                              | Year | Reference                              |
|-------------------------------------------------------------------------------------|---------------------------------------------------|-------------------------------------------------------------------------------------|------------------------------|-----------------------------------------------|------|----------------------------------------|
|    | DNA and siRNA functionalized                      |    | In vivo In vitro (RAW 264.7) | DCs                                           | 2006 | Yang R et al. (Gene Therapy)           |
|    | 1,3-dipolar cycloaddition and oxidation/amidation |    | Ex vivo                      | L. B and T, Macrophages and Polynuclear cells | 2006 | Dumortier H et al. (Nano Letters)      |
|    | Oxidized                                          |    | In vitro (RAW 264.7)         |                                               | 2007 | Dutta D et al. (Toxicological Science) |
|  | Silver iodide                                     |  | Ex vivo                      |                                               | 2007 | Porter AE et al. (Nat Nanotechnol.)    |
|  | Amination and FITC conjugation                    |  | Ex vivo                      |                                               | 2008 | Lacotte S. et al. (Adv. Materials)     |
|  | PEGylated                                         |  | in vivo                      |                                               | 2008 | Schipper ML (Nat Nanotechnol.)         |
|  | PKH 26                                            |  | In vivo                      |                                               | 2009 | VanHandel M et al. (Neuroimmunology)   |
|  | Acid-treated                                      |  | Ex vivo                      |                                               | 2009 | Porter AE et al. (ACS Nano)            |

|                                                                                     |                                                                                                                                |                                                                                     |                                        |                      |      |                                          |
|-------------------------------------------------------------------------------------|--------------------------------------------------------------------------------------------------------------------------------|-------------------------------------------------------------------------------------|----------------------------------------|----------------------|------|------------------------------------------|
|    | Phospholipids PC [pro-apoptotic cargo (cytochrome c)]                                                                          |     | In vivo, ex vivo, in vitro (RAW 264.7) | DCs, Brain microglia | 2009 | Konduru NV et al. (Plos One)             |
|    | Tuberculin purified protein derivative (PPD)                                                                                   |    | Ex vivo, in vivo                       | L. T, Macrophages    | 2009 | Zeinali M et al. (Immunology Letters)    |
|    | Oxidized and coated with stearyl alcohol, and derivatives coated with phosphatidylethanolamine (PE) or phosphatidylserine (PS) |    | Ex vivo, in vitro (U937 monoblastoid)  |                      | 2010 | Antonelli A et al. (Nanotechnology.)     |
|    | Oligonucleotide against NF-kB                                                                                                  |    | Ex vivo                                |                      | 2010 | Crinelli R et al. (ACS Nano)             |
|    | Polyaminobenzene sulfonic acids (PABS), sulfonate groups/PEG groups                                                            |    | Ex vivo                                |                      | 2010 | Klaper R et al. (Aquatic Toxicology)     |
|  | PL-PEGylated                                                                                                                   |  | In vitro (RAW 264.7)                   |                      | 2010 | Zhou F et al. (NANO Letters)             |
|  | Oxidized                                                                                                                       |  | In vivo                                |                      | 2010 | Meng J et al. (Nanotoxicology)           |
|  | Oxidized                                                                                                                       |  | In vivo                                |                      | 2010 | Deng X et al. (J Nanosci Nanotechnol.)   |
|  | Acid treated                                                                                                                   |  | In vivo                                | L. T                 | 2010 | Kim JE et al. (J Toxicol Environ Health) |
|  | Carboxylated                                                                                                                   |  | Ex vivo                                |                      | 2010 | Kagan VE et al. (Nat Nanotechnol.)       |

|                                                                                     |                                                           |                                                                                     |                               |           |      |                                                |
|-------------------------------------------------------------------------------------|-----------------------------------------------------------|-------------------------------------------------------------------------------------|-------------------------------|-----------|------|------------------------------------------------|
|    | Carboxylated                                              |    | In vivo, in vitro (THP1)      | Monocytes | 2011 | Wang X et al. (ACS Nano)                       |
|    | N-Boc-2,2-dioxyethylene diethylamine linker and FITC/L220 |    | In vitro (J774A)              |           | 2011 | Montes-Fonseca SL et al. (Nanomedicine)        |
|    | Carboxylated                                              |    | In vivo, in vitro (THP1)      |           | 2011 | Gao N et al. (ACS Nano)                        |
|    | Carboxylated/ammine-containing nanotubes                  |    | In vivo                       |           | 2011 | Roda E et al. (Histol Histopathol.)            |
|    | Oxidized/BSA                                              |    | In vivo                       |           | 2011 | Tahara Y et al. (Nanotechnology)               |
|  | Amphotericin B                                            |  | In vivo, in vitro (J774A.1)   |           | 2011 | Prajapati VK et al. (J Antimicrob Chemother.)  |
|  | Acid- and polystyrene-based                               |  | In vivo, in vitro (RAW 264.7) |           | 2011 | Tabet L et al. (Particle and Fibre Toxicology) |
|  | Ammonium functionalized                                   |  | Ex vivo                       |           | 2011 | Al-Jamal KT et al. (Nanoscale)                 |
|  | Oxidized and N-doped                                      |  | Ex vivo                       |           | 2011 | Boncel S et al. (Biomaterials)                 |
|  | Carboxylated                                              |  | In vivo                       |           | 2011 | Patlolla AK et al. (Mol Cell Biochem)          |

|                                                                                     |                                          |                                                                                     |                          |  |      |                                               |
|-------------------------------------------------------------------------------------|------------------------------------------|-------------------------------------------------------------------------------------|--------------------------|--|------|-----------------------------------------------|
|    | FeCo nanocrystal                         |    | In vivo                  |  | 2011 | Kosuge H et al. (Plos One)                    |
|    | Acid-treated                             |    | In vitro (RAW 264.7)     |  | 2012 | Dong PX et al. (Nanotoxicology)               |
|    | PEGylated/Tumor targetin folic acid (FA) |    | In vitro (RAW 264.7)     |  | 2012 | Zhang M et al (Small)                         |
|    | Oxidized                                 |    | In vitro (RAW 264.7)     |  | 2012 | Tahara Y et al. (Biomaterials)                |
|    | Taurine                                  |    | In vitro (RAW 264.7)     |  | 2012 | Chen T et al. (J Nanosci Nanotechnol)         |
|  | Carboxylated/PEGylated                   |  | In vitro (RAW 264.7)     |  | 2012 | Zhang T et al. (J Haz Mat)                    |
|  | Taurine                                  |  | In vitro (RAW 264.7)     |  | 2012 | Luo M et al. (J Nanosci Nanotechnol.)         |
|  | Oxidized                                 |  | In vitro (RAW 264.7)     |  | 2012 | Clark KA et al. (J Toxicol Environ Health A.) |
|  | Nanoplatelets                            |  | In vivo, in vitro (THP1) |  | 2012 | Schinwald A et al. (ACS Nano)                 |
|  | None                                     |  | In vitro (RAW 264.7)     |  | 2012 | Li Y et al. (Biomaterials)                    |

|                                                                                     |                                                                        |                                                                                     |                               |           |      |                                        |
|-------------------------------------------------------------------------------------|------------------------------------------------------------------------|-------------------------------------------------------------------------------------|-------------------------------|-----------|------|----------------------------------------|
|    | None                                                                   |    | In vitro (RAW 264.7)          |           | 2012 | Chen GY et al. (Biomaterials)          |
|    | None                                                                   |    | Ex vivo, in vitro (RAW 264.7) | PBMCs     | 2012 | Sasidharan A et al. (Small)            |
|    | None                                                                   |    | In vivo, in vitro (J774A.1)   |           | 2012 | Yue H et al. (Biomaterials)            |
|    | None                                                                   |    | Ex vivo, in vitro (RAW 264.7) |           | 2012 | Zhou H et al (Biomaterials)            |
|    | Indium tin oxide (ITO)                                                 |    | In vitro (RAW 264.7)          |           | 2013 | Rawson FJ et al. (NANO Letters)        |
|  | None                                                                   |  | In vitro (RAW 264.7)          |           | 2013 | Matesanz MC et al. (Biomaterials)      |
|  | Carboxylated, PEGylated, aminated, sidewall aminated, and PEI-modified |  | In vivo, in vitro (THP1)      | Monocytes | 2013 | Li R et al (ACS Nano)                  |
|  | Amphiphilic lipid-poly(ethylene glycol) (LPEG)                         |  | In vitro (RAW 264.7)          |           | 2013 | Yang M et al. (Acta Biomaterialia)     |
|  | Carboxylated                                                           |  | Ex vivo                       |           | 2013 | Hamilton RF Jr et al. (Inhal Toxicol.) |
|  | Carboxylated                                                           |  | In vivo, in vitro (RAW 264.7) |           | 2013 | Girish CM et al (Adv Healthc Mater )   |

|                                                                                                                                                                        |                                                    |                                                                                                                                                                            |                                       |           |      |                                                |
|------------------------------------------------------------------------------------------------------------------------------------------------------------------------|----------------------------------------------------|----------------------------------------------------------------------------------------------------------------------------------------------------------------------------|---------------------------------------|-----------|------|------------------------------------------------|
|                                                                                       | Coated with polyvinylpyrrolidone (PVP)             |                                                                                            | Ex vivo                               | L. T, DCs | 2013 | Zhi X et al. (Biomaterials)                    |
|                                                                                       | Phospholipids (PL) conjugated to hyaluronan (HA)   |                                                                                           | In vivo, in vitro (RAW 264.7)         |           | 2013 | Dvash R et al. (Journal of Controlled Release) |
| <br> | Acid functionalized - None                         |                                                                                           | Ex vivo                               |           | 2013 | Wan B et al. (Toxicology Letters)              |
|                                                                                       | Carboxylated-PEGylated                             |                                                                                           | Ex vivo, in vitro (RAW 264.7)         |           | 2013 | Jiang Y et al. (Plos One)                      |
|                                                                                       | Oxidized                                           |                                                                                           | Ex vivo, in vitro (J774A 1, RAW264.7) |           | 2013 | Qu G et al. (ACS Nano)                         |
|                                                                                     | Treated with Horse Serum                           |                                                                                         | In vitro (BV2)                        |           | 2013 | Villegas JC et al. (Adv. Healthcare Mater.)    |
|                                                                                     | Microsheets                                        |                                                                                         | In vitro (J774)                       |           | 2013 | Li Y et al. (PNAS)                             |
|                                                                                     | Dextran sulfate (DS)-PEGylated                     |                                                                                         | Ex vivo                               |           | 2013 | Kotagiri N et al. (J Biomed Nanotechnol)       |
|                                                                                     | Oxidized - benzoic acid functionalization and FITC |                                                                                         | In vivo, ex vivo                      | DCs       | 2013 | Yang M et al. (Small)                          |
|                                                                                     | None                                               | <br> | Ex vivo                               |           | 2013 | Russier J et al. (Nanoscale)                   |

| Legend                                                                              |                                                             |
|-------------------------------------------------------------------------------------|-------------------------------------------------------------|
|    | MWCNTs                                                      |
|    | DWCNTs                                                      |
|    | SWCNTs                                                      |
|    | Carbon Nanohorns                                            |
|    | Graphene                                                    |
|    | Graphene Oxide                                              |
|    | Mouse                                                       |
|  | Human                                                       |
| <i>Italics</i>                                                                      | <i>Articles that considered more than one type of cells</i> |
